# Supplementary material for: Na+ and Pr3+ co-doped orange-emitting CaYAl3O7 phosphors: synthesis, luminescence properties and theoretical calculations
Source: Royal Society of Chemistry journal article supplement (doi:10.1039/c8dt03828g), 2018-01-01
Supplement: c8dt03828g1.pdf [file c8dt03828g1.pdf]

## Na<sup>+</sup> and Pr<sup>3+</sup> co-doped orange-emitting CaYAl<sub>3</sub>O<sub>7</sub> phosphors: synthesis, luminescence properties and theoretical calculations

Fengjun Chun<sup>a</sup>, Binbin Zhang<sup>a</sup>, Honggang Liu<sup>b,\*</sup>, Wen Deng<sup>a</sup>, Wen Li<sup>a</sup>, Meilin Xie<sup>a</sup>, Chao Luo<sup>a</sup>,  
Weiqing Yang<sup>a,\*</sup>

<sup>a</sup> Key Laboratory of Advanced Technologies of Materials (Ministry of Education), School of  
Materials Science and Engineering, Southwest Jiaotong University, Chengdu 610031, China

<sup>b</sup> Department of Materials Science, Sichuan University, Chengdu 610064, China

### Corresponding Author E-mail

[\\*wqyang@swjtu.edu.cn](mailto:wqyang@swjtu.edu.cn)

[\\*liuhg@scu.edu.cn](mailto:liuhg@scu.edu.cn)

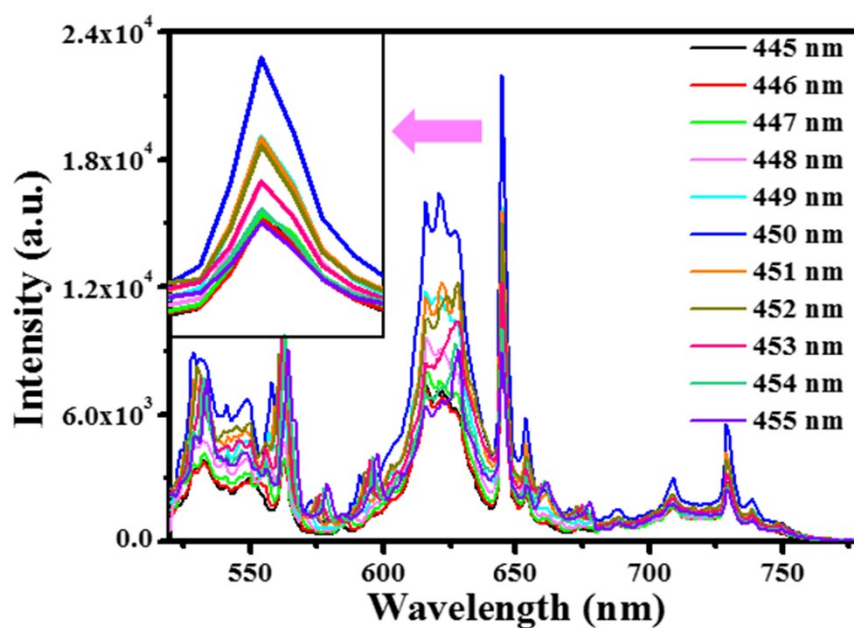

Fig. S1 Emission spectra of CYAO: 0.04Pr<sup>3+</sup> with various excitation wavelengths ranging from 445 nm to 455 nm

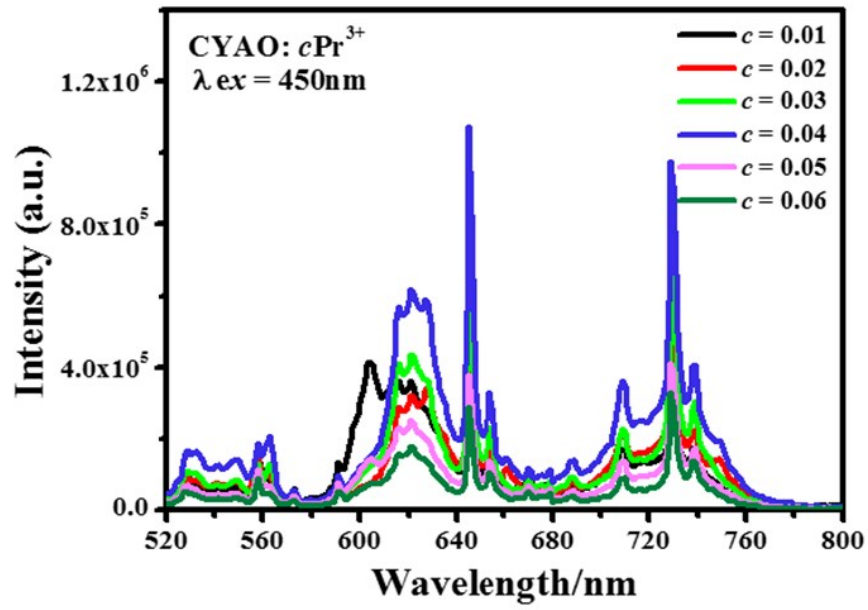

Fig. S2 Emission spectra of CYAO:  $\text{Pr}^{3+}$  with the various  $\text{Pr}^{3+}$  doping concentrations.

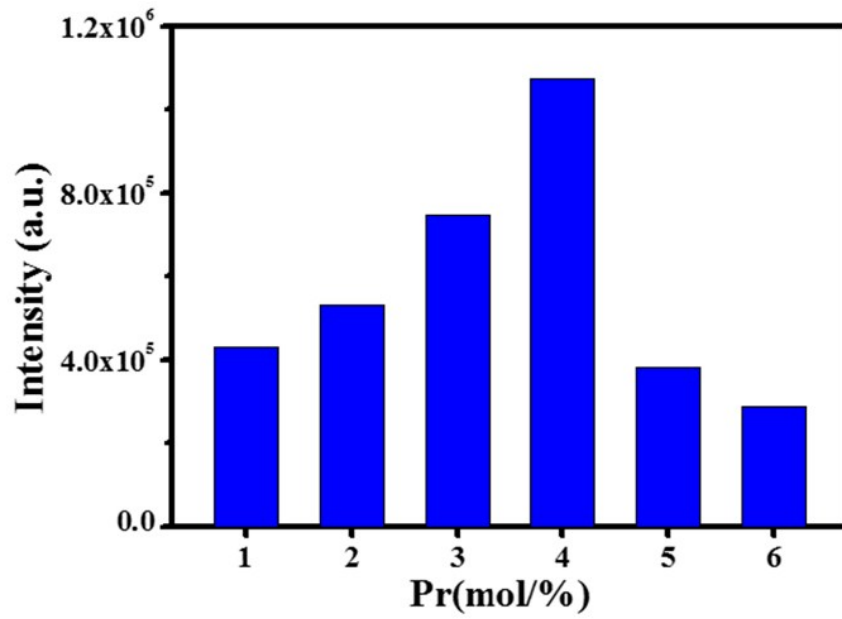

Fig. S3 Emission spectra of CYAO:  $\text{Pr}^{3+}$  with the various  $\text{Pr}^{3+}$  doping concentrations.
